# Supplementary material for: Disentangling the role of floral sensory stimuli in pollination networks
Source: PubMed Central journal article supplement (PMC5847531; doi:10.1038/s41467-018-03448-w), 2018-03-12
Supplement: 41467_2018_3448_MOESM1_ESM.pdf [file 41467_2018_3448_MOESM1_ESM.pdf]

## **SUPPLEMENTARY INFORMATION**

### **Disentangling the role of floral sensory stimuli in pollination networks**

Aphrodite Kantsa, Robert A. Raguso, Adrian G. Dyer, Jens M. Olesen, Thomas Tscheulin, Theodora Petanidou

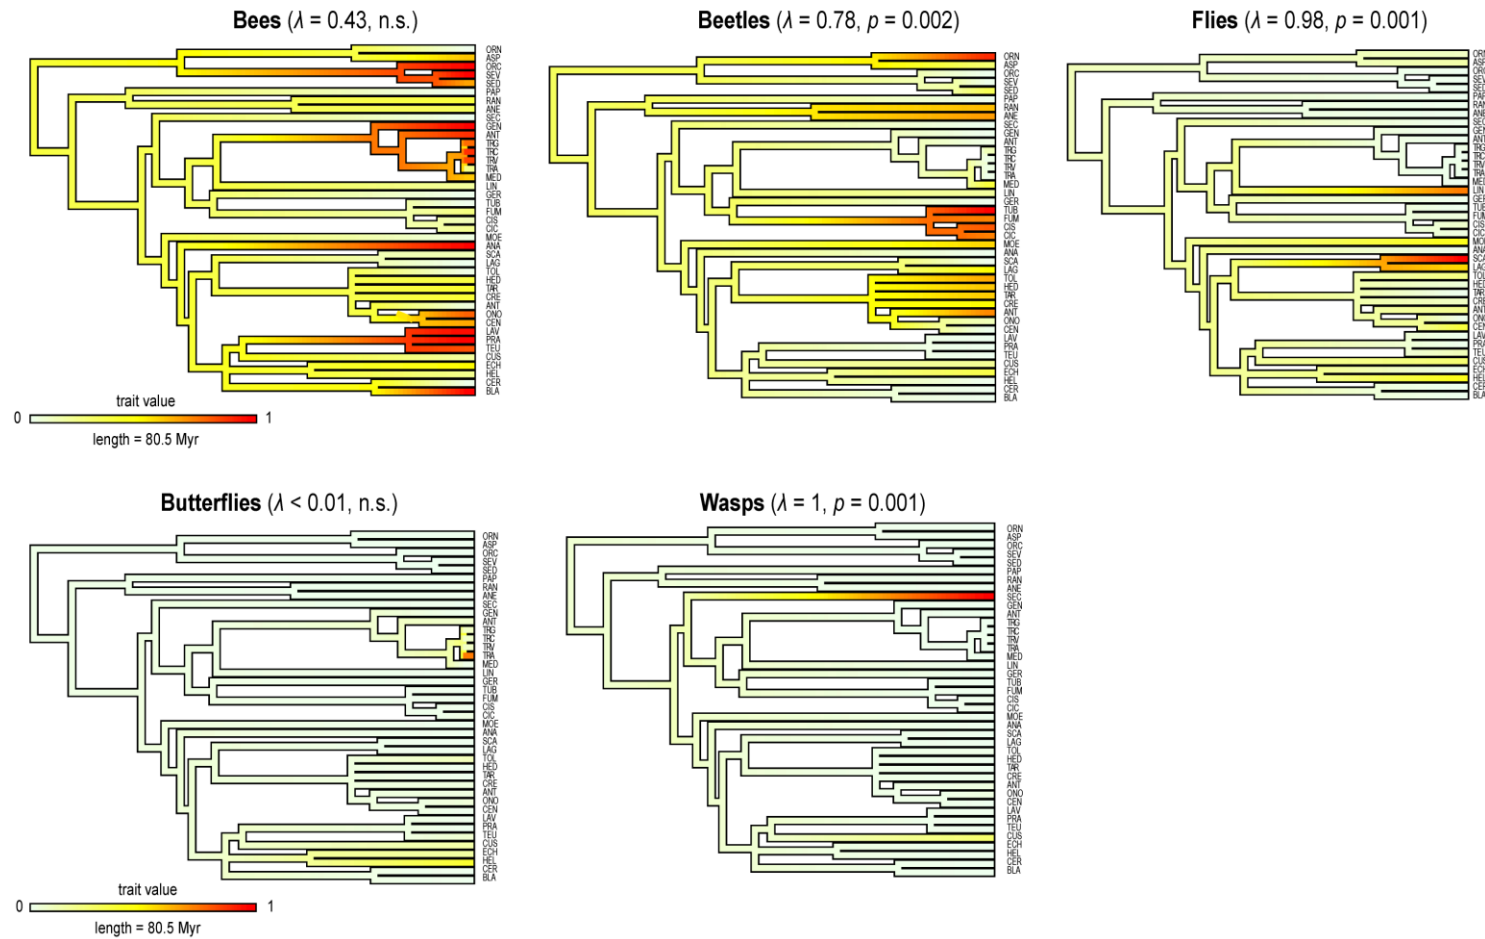

**Supplementary Figure 1.** The visitation rates (%) by each pollinator group mapped within the phylogram of the plants in the community. Phylogenetic signal measured with Pagel's  $\lambda$  is shown for every group (n.s.:  $P > 0.05$ ). For details, see Methods. Plant name abbreviations are explained in Table S6

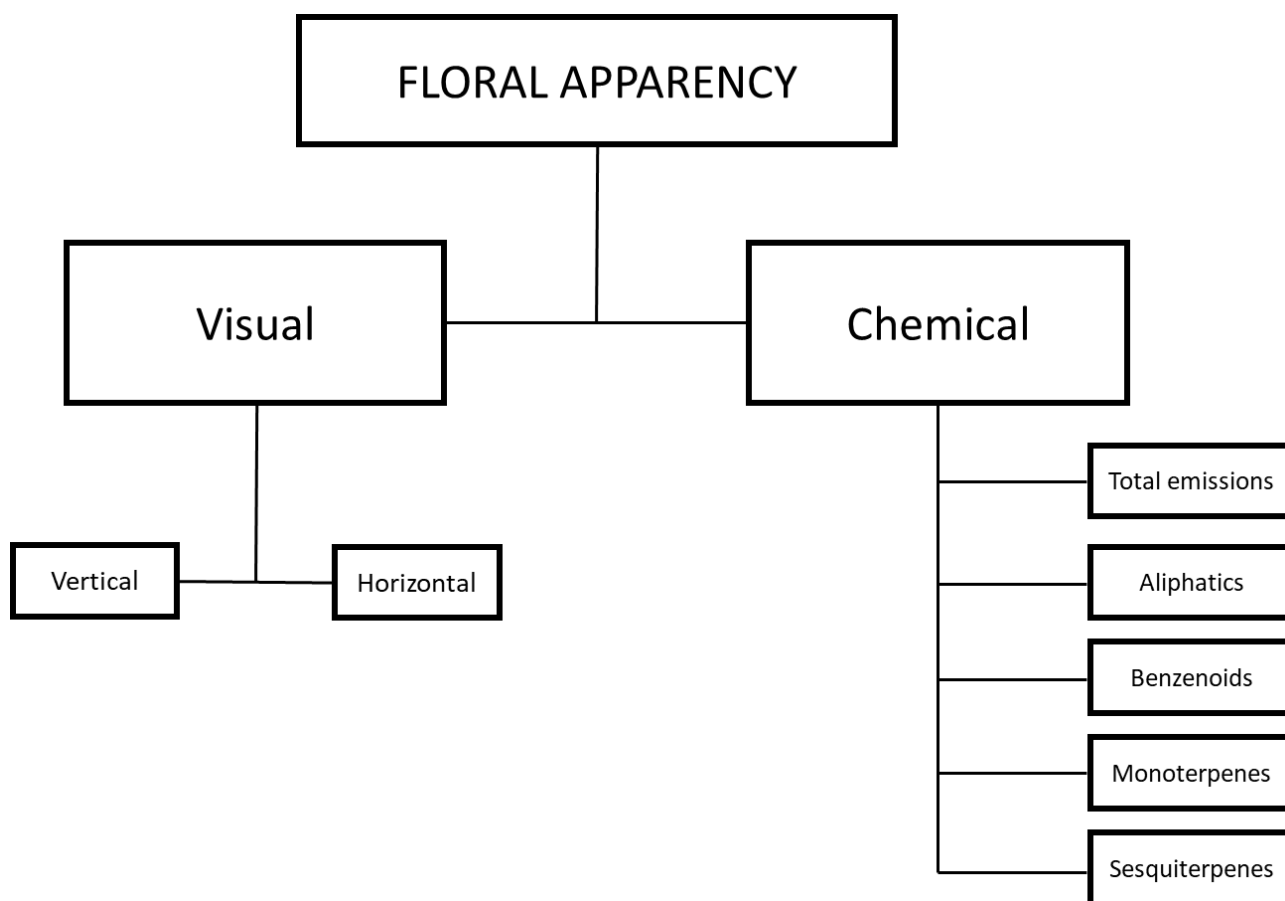

**Supplementary Figure 2.** The conceptual scheme including all types of floral apparency used in the present study.

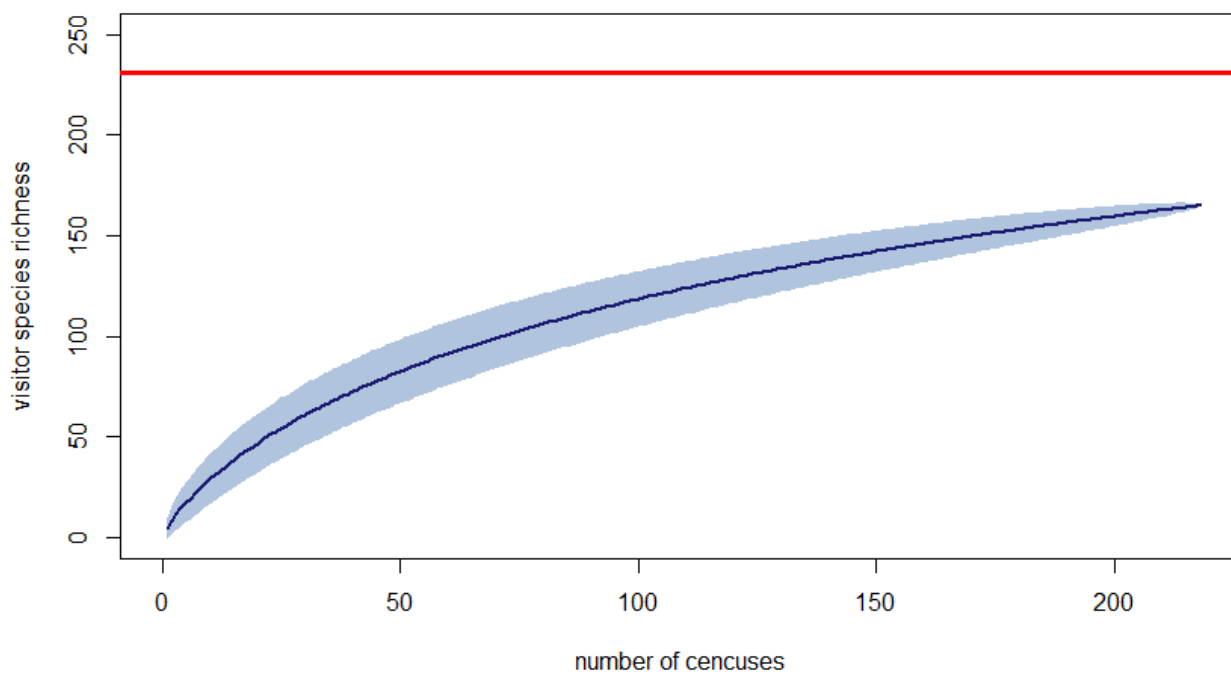

**Supplementary Figure 3.** Accumulation curve of the flower visitor species richness with increasing sampling effort for the phrygana network. Asymptotic species richness based on the Chao 2 estimator (red line) is shown. Sampling completeness was estimated at 73.0%.



**Supplementary Table 1.** The 168 flower-visiting insects recorded in the study community, and their phenology. For each Order, number of taxa is given in parentheses. Insects found only in the first year are marked with (1), and insects found only in the second year, with (2). For the rest insects, days of activity (day numbers of the Julian calendar) represent the mean values of the two years.

| Order                     | Family        | Insect                            | First day of activity | Last day of activity |
|---------------------------|---------------|-----------------------------------|-----------------------|----------------------|
| Coleoptera<br>(26; 15.5%) | Buprestidae   | <i>Acmaeodera bipunctata</i>      | 157                   | 173                  |
|                           |               | Buprestidae sp. A                 | 152                   | 155                  |
|                           |               | Buprestidae sp. B (1)             | 150                   | 150                  |
|                           |               | Buprestidae sp. C (1)             | 157                   | 173                  |
|                           | Cerambycidae  | Cerambycidae sp. A                | 124                   | 130                  |
|                           |               | Cerambycidae sp. B (2)            | 153                   | 153                  |
|                           |               | <i>Pseudovadonia livida</i>       | 143                   | 143                  |
|                           | Chrysomelidae | <i>Chrysolina americana</i> (1)   | 103                   | 129                  |
|                           |               | <i>Clytra atraphaxidis</i> (1)    | 103                   | 129                  |
|                           |               | <i>Labidostomis humeralis</i> (1) | 105                   | 105                  |
|                           | Cleridae      | <i>Diplocladus</i> sp. A          | 147                   | 152                  |
|                           |               | <i>Trichodes alvearius</i>        | 101                   | 139                  |
|                           | Curculionidae | <i>Larinus</i> sp. A (1)          | 157                   | 173                  |
|                           | Glaphyridae   | <i>Eulasia nitidicollis</i>       | 117                   | 124                  |
|                           |               | <i>Pygopleurus</i> sp. A          | 101                   | 102                  |
|                           | Melyridae     | <i>Dasytes</i> sp. A              | 103                   | 103                  |
|                           |               | <i>Malachius bipustulatus</i> (1) | 102                   | 160                  |
|                           | Mordellidae   | Mordellidae sp. A (1)             | 167                   | 167                  |
|                           | Oedemeridae   | <i>Oedemera</i> sp. A             | 109                   | 166                  |
|                           |               | <i>Oedemera</i> sp. B             | 168                   | 168                  |
|                           | Scarabaeidae  | <i>Anomala</i> sp. A              | 101                   | 143                  |
|                           |               | <i>Epicometis hirta</i>           | 101                   | 117                  |
|                           |               | <i>Osmoderma</i> sp. A            | 130                   | 169                  |
|                           |               | <i>Oxythyrea funesta</i>          | 133                   | 133                  |

| Order                  | Family        | Insect                              | First day of activity | Last day of activity |
|------------------------|---------------|-------------------------------------|-----------------------|----------------------|
|                        | Unknown       | Beetle sp. A (1)                    | 103                   | 120                  |
|                        |               | Beetle sp. B (2)                    | 153                   | 153                  |
| Diptera<br>(37; 22.0%) | Asilidae      | Asilidae sp. A (1)                  | 105                   | 120                  |
|                        |               | Asilidae sp. B (2)                  | 153                   | 153                  |
|                        | Bombyliidae   | <i>Bombylella atra</i> (1)          | 103                   | 157                  |
|                        |               | <i>Bombylius medius</i> (1)         | 103                   | 120                  |
|                        |               | <i>Bombylius posticus</i>           | 147                   | 166                  |
|                        |               | <i>Bombylius rhodius</i>            | 101                   | 102                  |
|                        |               | <i>Cyllenia rustica</i>             | 157                   | 157                  |
|                        |               | <i>Exoprosopa minois</i>            | 147                   | 161                  |
|                        |               | <i>Exoprosopa pandora</i>           | 147                   | 176                  |
|                        |               | <i>Lomatia</i> sp. A (1)            | 150                   | 157                  |
|                        |               | <i>Petrorossia chraminensis</i> (2) | 153                   | 178                  |
|                        |               | <i>Phthiria subnitens</i> (1)       | 173                   | 173                  |
|                        |               | <i>Thyridanthrax elegans</i> (1)    | 167                   | 167                  |
|                        |               | <i>Villa hottentotta</i> (2)        | 164                   | 164                  |
|                        | Calliphoridae | Calliphoridae sp. A (1)             | 167                   | 167                  |
|                        |               | Calliphoridae sp. B (1)             | 103                   | 142                  |
|                        | Empididae     | Empididae sp. A (2)                 | 98                    | 98                   |
|                        | Hybotidae     | Hybotidae sp. A (1)                 | 103                   | 105                  |
|                        | Syrphidae     | <i>Eristalinus aeneus</i> (2)       | 164                   | 164                  |
|                        |               | <i>Eristalis tenax</i>              | 136                   | 150                  |
|                        |               | <i>Eumerus pulchellus</i>           | 102                   | 150                  |
|                        |               | <i>Eupeodes corollae</i> (2)        | 113                   | 113                  |
|                        |               | <i>Merodon albifrons</i> (1)        | 150                   | 150                  |
|                        |               | <i>Merodon spinitarsis</i>          | 121                   | 121                  |
|                        |               | <i>Paragus haemorrhous</i> (1)      | 167                   | 167                  |
|                        |               | <i>Paragus</i> sp. A (1)            | 173                   | 173                  |

| Order                             | Family          | Insect                                | First day of activity | Last day of activity |
|-----------------------------------|-----------------|---------------------------------------|-----------------------|----------------------|
|                                   |                 | <i>Sphaerophoria scripta</i> (1)      | 142                   | 142                  |
|                                   |                 | <i>Syrirta pipiens</i> (1)            | 167                   | 167                  |
|                                   | Tachinidae      | Tachinidae sp. A                      | 142                   | 166                  |
|                                   | Tephritidae     | Tephritidae sp. A (1)                 | 103                   | 105                  |
|                                   | Tipulidae       | Tipulidae sp. A (1)                   | 105                   | 105                  |
|                                   | Unknown         | Fly sp. A                             | 103                   | 105                  |
|                                   |                 | Fly sp. B                             | 105                   | 105                  |
|                                   |                 | Fly sp. C                             | 103                   | 120                  |
|                                   |                 | Fly sp. D (1)                         | 108                   | 117                  |
|                                   |                 | Fly sp. E (1)                         | 129                   | 129                  |
|                                   |                 | Fly sp. F                             | 105                   | 105                  |
| Hemiptera<br>(3; 1.8%)            | Auchenorrhyncha | <i>Auchenorrhyncha</i> sp. A          | 142                   | 150                  |
|                                   | Miridae         | <i>Calocoris</i> sp. A                | 103                   | 105                  |
|                                   |                 | Bug sp. A                             | 105                   | 120                  |
| Hymenoptera – Bees (66;<br>39.3%) | Andrenidae      | <i>Andrena</i> aff. <i>hesperia</i>   | 102                   | 102                  |
|                                   |                 | <i>Andrena</i> aff. <i>neocyprica</i> | 128                   | 128                  |
|                                   |                 | <i>Andrena panurgimorpha</i> (1)      | 135                   | 142                  |
|                                   |                 | <i>Andrena schencki</i> (2)           | 113                   | 113                  |
|                                   |                 | <i>Andrena</i> sp. A (1)              | 103                   | 129                  |
|                                   |                 | <i>Andrena</i> sp. C (1)              | 120                   | 129                  |
|                                   |                 | <i>Andrena westensis</i> (2)          | 98                    | 178                  |
|                                   | Apidae          | <i>Amegilla albigena</i>              | 152                   | 169                  |
|                                   |                 | <i>Amegilla quadrifasciata</i>        | 163                   | 176                  |
|                                   |                 | <i>Amegilla salviae</i> (1)           | 173                   | 173                  |
|                                   |                 | <i>Anthophora crinipes</i> (2)        | 113                   | 125                  |
|                                   |                 | <i>Anthophora dalmatica</i>           | 109                   | 127                  |
|                                   |                 | <i>Anthophora plumipes</i> (1)        | 103                   | 103                  |



| Order | Family     | Insect                                                   | First day of activity | Last day of activity |
|-------|------------|----------------------------------------------------------|-----------------------|----------------------|
|       |            | <i>Anthophora rubricrus</i> (1)                          | 105                   | 105                  |
|       |            | <i>Apis mellifera</i>                                    | 101                   | 176                  |
|       |            | <i>Bombus terrestris</i>                                 | 114                   | 155                  |
|       |            | <i>Ceratina acuta</i> (2)                                | 125                   | 153                  |
|       |            | <i>Ceratina schwarzi</i> (2)                             | 113                   | 178                  |
|       |            | <i>Ceratina</i> sp. A (1)                                | 167                   | 167                  |
|       |            | <i>Epeolus variegatus</i> (1)                            | 157                   | 157                  |
|       |            | <i>Eucera cineraria</i> group                            | 124                   | 143                  |
|       |            | <i>Eucera digitata</i>                                   | 130                   | 138                  |
|       |            | <i>Eucera</i> aff. <i>pseudeucnemidea</i> (2)            | 125                   | 125                  |
|       |            | <i>Eucera seminuda</i>                                   | 139                   | 139                  |
|       |            | <i>Xylocopa iris</i>                                     | 114                   | 169                  |
|       |            | <i>Xylocopa violacea</i>                                 | 141                   | 166                  |
|       | Colletidae | <i>Colletes eous</i> (2)                                 | 136                   | 136                  |
|       |            | <i>Colletes</i> sp. A                                    | 147                   | 147                  |
|       |            | <i>Hylaeus meridionalis</i> (1)                          | 167                   | 167                  |
|       | Halictidae | <i>Halictus resurgens</i>                                | 147                   | 176                  |
|       |            | <i>Halictus sexcinctus</i> (1)                           | 167                   | 173                  |
|       |            | <i>Halictus</i> aff. <i>tumulorum.confusus</i> (2)       | 153                   | 153                  |
|       |            | <i>Lasioglossum laticeps/mediterraneum</i> (2)           | 136                   | 153                  |
|       |            | <i>Lasioglossum</i> aff. <i>lativentre/haesitans</i> (2) | 136                   | 136                  |
|       |            | <i>Lasioglossum leucozonium</i>                          | 109                   | 155                  |
|       |            | <i>Lasioglossum malachurum</i> group                     | 152                   | 157                  |
|       |            | <i>Lasioglossum marginatum</i> (1)                       | 129                   | 129                  |
|       |            | <i>Lasioglossum pygmaeum/pauperatum</i>                  | 101                   | 133                  |
|       |            | <i>Lasioglossum</i> sp. B (2)                            | 113                   | 113                  |
|       |            | <i>Lasioglossum tricinctum</i> group                     | 101                   | 160                  |
|       |            | <i>Lasioglossum villosulum</i> group (2)                 | 136                   | 136                  |

| Order                              | Family       | Insect                                      | First day of activity | Last day of activity |
|------------------------------------|--------------|---------------------------------------------|-----------------------|----------------------|
|                                    |              | <i>Pseudapis monstrosa</i> (2)              | 136                   | 153                  |
|                                    | Megachilidae | <i>Anthidiellum strigatum</i>               | 155                   | 155                  |
|                                    |              | <i>Anthidium</i> aff. <i>dalmaticum</i> (2) | 153                   | 153                  |
|                                    |              | <i>Eoanthidium insulare</i> (2)             | 178                   | 178                  |
|                                    |              | <i>Eoanthidium</i> aff. <i>judaense</i> (2) | 160                   | 160                  |
|                                    |              | <i>Eoanthidium</i> sp. A                    | 164                   | 164                  |
|                                    |              | <i>Hoplitis adunca</i> group (2)            | 125                   | 125                  |
|                                    |              | <i>Hoplitis</i> aff. <i>illyrica</i>        | 141                   | 141                  |
|                                    |              | <i>Hoplitis</i> aff. <i>lysholmi</i>        | 152                   | 155                  |
|                                    |              | <i>Hoplitis</i> sp. A (2)                   | 125                   | 125                  |
|                                    |              | <i>Hoplitis</i> sp. C (1)                   | 142                   | 142                  |
|                                    |              | <i>Lithurgus chrysurus</i> (1)              | 173                   | 173                  |
|                                    |              | <i>Megachile albisecta</i>                  | 163                   | 163                  |
|                                    |              | <i>Megachile giraudi</i> (2)                | 136                   | 136                  |
|                                    |              | <i>Megachile hungarica</i>                  | 147                   | 173                  |
|                                    |              | <i>Megachile manicata</i> (2)               | 98                    | 153                  |
|                                    |              | <i>Megachile parietina</i> (2)              | 98                    | 136                  |
|                                    |              | <i>Megachile pilicrus</i>                   | 155                   | 176                  |
|                                    |              | <i>Megachile</i> sp. A (1)                  | 167                   | 167                  |
|                                    |              | <i>Osmia dimidiata</i>                      | 163                   | 163                  |
|                                    |              | <i>Osmia</i> aff. <i>helicosmia</i> (2)     | 125                   | 125                  |
|                                    |              | <i>Osmia</i> sp. B (2)                      | 125                   | 125                  |
|                                    |              | <i>Osmia</i> sp. C (2)                      | 125                   | 125                  |
|                                    |              | <i>Osmia versicolor</i> (2)                 | 125                   | 125                  |
|                                    |              | <i>Rhodanthidium septemdentatum</i> (2)     | 125                   | 178                  |
| Hymenoptera – Wasps (19;<br>11.3%) | Chrysididae  | <i>Chrysididae</i> sp. A (1)                | 157                   | 157                  |
|                                    |              | <i>Chrysididae</i> sp. B (2)                | 113                   | 113                  |
|                                    |              | <i>Chrysura circe</i> (1)                   | 103                   | 103                  |

| Order                      | Family       | Insect                             | First day of activity | Last day of activity |
|----------------------------|--------------|------------------------------------|-----------------------|----------------------|
|                            | Crabronidae  | <i>Bembix bicolor</i> (2)          | 136                   | 153                  |
|                            |              | Crabronidae sp. A (1)              | 150                   | 150                  |
|                            |              | Crabronidae sp. C (2)              | 164                   | 178                  |
|                            | Eumenidae    | Eumenidae sp. A (1)                | 167                   | 167                  |
|                            |              | Eumenidae sp. B (2)                | 136                   | 136                  |
|                            |              | Eumenidae sp. C (2)                | 136                   | 136                  |
|                            |              | Eumenidae sp. D (2)                | 136                   | 136                  |
|                            | Leucospidae  | <i>Leucospis gigas</i> (1)         | 167                   | 167                  |
|                            | Pompilidae   | <i>Cryptocheilus</i> sp. A         | 117                   | 124                  |
|                            | Sapygidae    | <i>Sapyga</i> sp. A (1)            | 135                   | 135                  |
|                            | Scoliidae    | <i>Colpa quinquecincta</i> (2)     | 178                   | 178                  |
|                            |              | <i>Megascolia maculata</i>         | 147                   | 155                  |
|                            |              | <i>Scolia</i> sp. A (2)            | 164                   | 178                  |
|                            | Tiphiidae    | <i>Tiphia</i> sp. A (2)            | 113                   | 113                  |
|                            | Vespidae     | <i>Polistes</i> sp. A              | 164                   | 173                  |
|                            |              | <i>Vespa orientalis</i> (1)        | 142                   | 167                  |
| Lepidoptera<br>(17; 10.1%) | Hesperiidae  | <i>Charcharodus orientalis</i> (2) | 153                   | 178                  |
|                            |              | <i>Spialia orbifer</i> (2)         | 178                   | 178                  |
|                            |              | <i>Thymelicus acteon</i> (1)       | 157                   | 157                  |
|                            |              | <i>Thymelicus sylvestris</i>       | 160                   | 160                  |
|                            | Lycaenidae   | <i>Lycaena phlaeas</i>             | 143                   | 161                  |
|                            |              | <i>Pseudophilotes vicrama</i>      | 128                   | 155                  |
|                            | Noctuidae    | Noctuidae sp. A (1)                | 167                   | 167                  |
|                            |              | Noctuidae sp. B (2)                | 136                   | 136                  |
|                            |              | <i>Trichoplusia ni</i> (1)         | 157                   | 157                  |
|                            | Nymphalidae  | <i>Coenonympha pamphilus</i>       | 141                   | 157                  |
|                            |              | <i>Maniola telmessia</i>           | 130                   | 143                  |
|                            | Papilionidae | <i>Papilio machaon</i> (1)         | 157                   | 167                  |

| <b>Order</b> | <b>Family</b> | <b>Insect</b>                       | <b>First day of activity</b> | <b>Last day of activity</b> |
|--------------|---------------|-------------------------------------|------------------------------|-----------------------------|
|              | Pieridae      | <i>Colias crocea</i>                | 128                          | 155                         |
|              |               | <i>Gonepteryx cleoptatra</i> (2)    | 136                          | 136                         |
|              |               | <i>Pieris brassicae</i> (1)         | 157                          | 167                         |
|              | Sphingidae    | <i>Macroglossum stellatarum</i> (2) | 136                          | 153                         |
|              | Zygaenidae    | Zygaenidae sp. A (2)                | 125                          | 125                         |

**Supplementary Table 2.** Module composition of the entire network in the study community. For details, see Methods.

| Module                                        |         | Species                                           |
|-----------------------------------------------|---------|---------------------------------------------------|
| #1                                            | Plants  | <i>Sedum confertiflorum</i>                       |
|                                               | Insects | <i>Chrysididae</i> sp. B<br><i>Chrysura circe</i> |
| #2                                            | Plants  | <i>Anthemis auriculata</i>                        |
|                                               |         | <i>Blackstonia perfoliata</i>                     |
|                                               |         | <i>Heliotropium lasiocarpum</i>                   |
|                                               |         | <i>Linum trigynum</i>                             |
|                                               |         | <i>Trifolium arvense</i>                          |
|                                               | Insects | <i>Bombylius posticus</i>                         |
|                                               |         | <i>Cerambycidae</i> sp. A                         |
|                                               |         | <i>Ceratina schwarzi</i>                          |
|                                               |         | <i>Charcharodus orientalis</i>                    |
|                                               |         | <i>Chrysididae</i> sp. A                          |
|                                               |         | <i>Cyllenia rustica</i>                           |
|                                               |         | <i>Eucera digitata</i>                            |
|                                               |         | <i>Eupeodes corollae</i>                          |
|                                               |         | <i>Exoprosopa minois</i>                          |
| <i>Exoprosopa pandora</i>                     |         |                                                   |
| <i>Hoplitis illyrica</i> aff.                 |         |                                                   |
| <i>Hoplitis lysholmi</i> aff.                 |         |                                                   |
| <i>Lasioglossum lativentre/haesitans</i> aff. |         |                                                   |
| <i>Sapyga</i> sp. A                           |         |                                                   |
| <i>Spialia orbifer</i>                        |         |                                                   |
| #3                                            | Plants  | <i>Anagallis arvensis</i>                         |
|                                               |         | <i>Cistus creticus</i>                            |
|                                               |         | <i>Lavandula stoechas</i> subsp. <i>stoechas</i>  |
|                                               |         | <i>Prasium majus</i>                              |
|                                               |         | <i>Serapias cordigera</i>                         |
|                                               |         | <i>Trifolium angustifolium</i>                    |
|                                               | Insects | <i>Acmaeodera bipunctata</i>                      |
|                                               |         | <i>Anthophora crinipes</i>                        |
|                                               |         | <i>Anthophora dalmatica</i>                       |
|                                               |         | <i>Anthophora plumipes</i>                        |
|                                               |         | <i>Anthophora rubricrus</i>                       |
| <i>Asilidae</i> sp. A                         |         |                                                   |
| <i>Beetle</i> sp. B                           |         |                                                   |
| <i>Bembix bicolor</i>                         |         |                                                   |
| <i>Bombylius medius</i>                       |         |                                                   |
| <i>Cerambycidae</i> sp. B                     |         |                                                   |
| <i>Chrysolina americana</i>                   |         |                                                   |
| <i>Crabronidae</i> sp. A                      |         |                                                   |
| <i>Cryptocheilus</i> sp. A                    |         |                                                   |
| <i>Eoanthidium insulare</i>                   |         |                                                   |
| <i>Eristalinus aeneus</i>                     |         |                                                   |
| <i>Eristalistenax</i>                         |         |                                                   |

| Module | Species                                                                                                                                                                                                                                                                                                                                                                                                                                                                                                                                                       |
|--------|---------------------------------------------------------------------------------------------------------------------------------------------------------------------------------------------------------------------------------------------------------------------------------------------------------------------------------------------------------------------------------------------------------------------------------------------------------------------------------------------------------------------------------------------------------------|
|        | <i>Eucera cineraria</i> -group<br><i>Eucera seminuda</i><br><i>Eumenidae</i> sp. B<br><i>Eumenidae</i> sp. C<br><i>Hoplitis</i> sp. A<br><i>Lasioglossum laticeps/mediterraneum</i><br><i>Lasioglossum pygmaeum/pauperatum</i><br><i>Maniola telmessia</i><br><i>Merodon albifrons</i><br><i>Oedemera</i> sp. B<br><i>Pseudapis monstrosa</i><br><i>Pseudovadonia livida</i><br><i>Rhodanthidium septedentatum</i><br><i>Tipulidae</i> sp. A<br><i>Villa hottentotta</i><br><i>Xylocopa iris</i><br><i>Zygaenidae</i> sp. A                                   |
| #4     | Plants <i>Cuscuta epithimum</i><br>Insects <i>Asilidae</i> sp. B<br><i>Calliphoridae</i> sp. A<br><i>Colletes</i> sp. A<br><i>Colpa quinquecincta</i><br><i>Crabronidae</i> sp. C<br><i>Eoanthidium judaense</i> aff.<br><i>Eoanthidium</i> sp. A<br><i>Eumenidae</i> sp. A<br><i>Hylaeus meridionalis</i><br><i>Leucospis gigas</i><br><i>Megascolia maculata</i><br><i>Mordellidae</i> sp. A<br><i>Paragushaemorhous</i><br><i>Paraguss</i> sp. A<br><i>Polistes</i> sp. A<br><i>Scolia</i> sp. A<br><i>Syritta pipiens</i><br><i>Thyridanthrax elegans</i> |
| #5     | Plants <i>Asphodelus ramosus</i><br><i>Moenchia mantica</i><br><i>Scandix</i> sp.<br>Insects <i>Andrena</i> sp. A<br><i>Bombylius rhodius</i><br><i>Calocoris</i> sp. A<br><i>Empididae</i> sp. A<br><i>Eumerus pulchellus</i><br><i>Fly</i> sp. A<br><i>Fly</i> sp. B<br><i>Fly</i> sp. C<br><i>Fly</i> sp. D<br><i>Fly</i> sp. F                                                                                                                                                                                                                            |

| Module |         | Species                                                                                                                                                                                                                                                                                                                                                                                                                                                                                                                                                                                                                                                                                                        |
|--------|---------|----------------------------------------------------------------------------------------------------------------------------------------------------------------------------------------------------------------------------------------------------------------------------------------------------------------------------------------------------------------------------------------------------------------------------------------------------------------------------------------------------------------------------------------------------------------------------------------------------------------------------------------------------------------------------------------------------------------|
|        |         | <i>Hybotidae</i> cf. sp. A<br><i>Tephritidae</i> sp. A<br><i>Trichodes alvearius</i>                                                                                                                                                                                                                                                                                                                                                                                                                                                                                                                                                                                                                           |
| #6     | Plants  | <i>Anthyllis hermanniae</i><br><i>Echium plantagineum</i><br><i>Genista acanthoclada</i><br><i>Orchis sancta</i>                                                                                                                                                                                                                                                                                                                                                                                                                                                                                                                                                                                               |
|        | Insects | <i>Anthidiellum strigatum</i><br><i>Ceratina acuta</i><br><i>Ceratina</i> sp. A<br><i>Colletes eous</i><br><i>Epeolus variegatus</i><br><i>Hoplitis adunca</i> -group<br><i>Lasioglossum leucozonium</i><br><i>Lasioglossum</i> sp. B<br><i>Lycaena phlaeas</i><br><i>Megachile manicata</i><br><i>Megachile parietina</i><br><i>Noctuidae</i> sp. B<br><i>Osmia helicosmia</i> aff.<br><i>Oxythyrea funesta</i><br><i>Pseudophilotes vicrama</i>                                                                                                                                                                                                                                                              |
| #7     | Plants  | <i>Centaurea solstitialis</i><br><i>Onopordum tauricum</i><br><i>Teucrium divaricatum</i>                                                                                                                                                                                                                                                                                                                                                                                                                                                                                                                                                                                                                      |
|        | Insects | <i>Amegilla albigena</i><br><i>Amegilla quadrifasciata</i><br><i>Amegilla salviae</i><br><i>Anthidium dalmaticum</i> aff.<br><i>Bombus terrestris</i><br><i>Buprestidae</i> sp. A<br><i>Buprestidae</i> sp. C<br><i>Colias crocea</i><br><i>Diplocladus</i> sp. A<br><i>Gonepteryx cleoptatra</i><br><i>Halictus resurgens</i><br><i>Halictus sexcinctus</i><br><i>Larinus</i> sp. A<br><i>Lithurgus chrysurus</i><br><i>Macroglossum stellatarum</i><br><i>Megachile albisecta</i><br><i>Megachile giraudi</i><br><i>Megachile hungarica</i><br><i>Megachile pilicrus</i><br><i>Megachile</i> sp. A<br><i>Noctuidae</i> sp. A<br><i>Osmia dimidiata</i><br><i>Papiliomachaon</i><br><i>Phthiria subnitens</i> |

| Module | Species                                                                                                                                                                                                                                                                                                                                                                                                                                                                                                                                                                                                                                                                          |
|--------|----------------------------------------------------------------------------------------------------------------------------------------------------------------------------------------------------------------------------------------------------------------------------------------------------------------------------------------------------------------------------------------------------------------------------------------------------------------------------------------------------------------------------------------------------------------------------------------------------------------------------------------------------------------------------------|
|        | <i>Pieris brassicae</i><br><i>Osmoderma</i> sp. A<br><i>Thymelicus acteon</i><br><i>Thymelicus sylvestris</i><br><i>Trichoplusiani</i><br><i>Vespa orientalis</i><br><i>Xylocopa violacea</i>                                                                                                                                                                                                                                                                                                                                                                                                                                                                                    |
| #8     | <b>Plants</b><br><i>Anemone pavonina</i><br><i>Cistus salvifolius</i><br><i>Fumana arabica</i><br><i>Hedypnois cretica</i><br><i>Lagoecia cuminoidea</i><br><i>Medicago minima</i><br><i>Ornithogalum</i> sp.<br><i>Ranunculus paludosus</i><br><i>Taraxacum</i> sp.<br><i>Tolpis barbata</i><br><i>Trifolium campestre</i><br><i>Trifolium glanduliferum</i> var. <i>nervulosum</i><br><i>Tuberaria guttata</i>                                                                                                                                                                                                                                                                 |
|        | <b>Insects</b><br><i>Andrena hesperia</i> aff.<br><i>Andrena schencki</i><br><i>Andrena westensis</i><br><i>Anomala</i> cf. sp. A<br><i>Apis mellifera</i><br><i>Auchenorrhyncha</i> sp. A<br><i>Beetle</i> sp. A<br><i>Bombylella atra</i><br><i>Bug</i> sp. A<br><i>Coenonympha pamphilus</i><br><i>Dasytes</i> sp. A<br><i>Epicometis hirta</i><br><i>Eulasia nitidicollis</i><br><i>Eumenidae</i> sp. D<br><i>Labidostomis humeralis</i><br><i>Lasioglossum tricinatum</i> (group)<br><i>Lomatia</i> sp. A<br><i>Malachius bipustulatus</i><br><i>Oedemera</i> sp. A<br><i>Osmia</i> sp. B<br><i>Osmia versicolor</i><br><i>Pygopleurus</i> sp. A<br><i>Tachinidae</i> sp. A |
| #9     | <b>Plants</b><br><i>Crepis neglecta</i><br><i>Serapias vomeracea</i>                                                                                                                                                                                                                                                                                                                                                                                                                                                                                                                                                                                                             |
|        | <b>Insects</b><br><i>Andrena neocyprica</i> aff.<br><i>Andrena panurgimorpha</i><br><i>Andrena</i> sp. C<br><i>Buprestidae</i> sp. B                                                                                                                                                                                                                                                                                                                                                                                                                                                                                                                                             |



| Module | Species                                 |
|--------|-----------------------------------------|
|        | <i>Calliphoridae</i> sp. B              |
|        | <i>Clytra atraphaxidis</i>              |
|        | <i>Eucera pseudeucnemidea</i> aff.      |
|        | <i>Fly</i> sp. E                        |
|        | <i>Halictus tumulorum/confusus</i> aff. |
|        | <i>Hoplitis</i> sp. C                   |
|        | <i>Lasioglossum malachurum</i> (group)  |
|        | <i>Lasioglossum marginatum</i>          |
|        | <i>Lasioglossum villosulum</i> -group   |
|        | <i>Merodon spinitarsis</i>              |
|        | <i>Osmia</i> sp. C                      |
|        | <i>Petrorossia chraminensis</i>         |
|        | <i>Sphaerophoria scripta</i>            |
|        | <i>Tiphia</i> sp. A                     |

**Supplementary Table 3.** Sizes of the *phenonets* in the study community, connectance and nestedness. Metrics are also shown for the *phenonets* of the plants that received no visits.

| <i>phenonet</i>                 | Connectance (%) | Nestedness (%) | # Insects | # Plants |
|---------------------------------|-----------------|----------------|-----------|----------|
| <i>Anagallis arvensis</i>       | 6.7             | 95.2           | 158       | 37       |
| <i>Anemone pavonina</i>         | 13.9            | 82.5           | 47        | 24       |
| <i>Anthemis auriculata</i>      | 6.6             | 95.3           | 165       | 36       |
| <i>Anthyllis hermanniae</i>     | 16.5            | 85.4           | 51        | 20       |
| <i>Asphodelus ramosus</i>       | 14.4            | 81.8           | 47        | 23       |
| <i>Blackstonia perfoliata</i>   | 9.2             | 92.8           | 68        | 36       |
| <i>Centaurea solstitialis</i>   | 19              | 82.2           | 42        | 16       |
| <i>Centaureum pulchellum</i>    | 19.8            | 80.5           | 42        | 15       |
| <i>Cistus creticus</i>          | 6.7             | 95.2           | 158       | 37       |
| <i>Cistus salviifolius</i>      | 8.3             | 92.9           | 99        | 34       |
| <i>Crepis neglecta</i>          | 7.8             | 94.6           | 115       | 35       |
| <i>Cuscuta epithymum</i>        | 14.3            | 86.6           | 77        | 16       |
| <i>Echium plantagineum</i>      | 6.8             | 95.8           | 143       | 37       |
| <i>Fumana arabica</i>           | 6.7             | 95.2           | 158       | 37       |
| <i>Genista acanthoclada</i>     | 13.7            | 82.5           | 47        | 24       |
| <i>Geranium robertianum</i>     | 8.9             | 94.4           | 91        | 32       |
| <i>Hedypnois cretica</i>        | 8.5             | 93.4           | 96        | 33       |
| <i>Heliotropium lasiocarpum</i> | NA              | NA             | NA        | NA       |
| <i>Lagoecia cuminoides</i>      | 11.4            | 91.1           | 68        | 27       |
| <i>Lavandula stoechas</i>       | 7.1             | 94.3           | 139       | 37       |
| <i>Linum trigynum</i>           | 6.8             | 95.8           | 143       | 37       |
| <i>Medicago minima</i>          | 15.2            | 89.9           | 46        | 18       |
| <i>Moenchia mantica</i>         | 7.2             | 94.0           | 135       | 37       |
| <i>Onopordum tauricum</i>       | 13.5            | 87.0           | 88        | 16       |
| <i>Orchis sancta</i>            | 9.9             | 89.7           | 72        | 31       |
| <i>Ornithogalum</i> sp.         | 17.1            | 78.7           | 30        | 24       |
| <i>Papaver argemone</i>         | 11.4            | 92.5           | 49        | 28       |
| <i>Prasium majus</i>            | 14              | 89.4           | 41        | 25       |
| <i>Ranunculus paludosus</i>     | 15.5            | 79.5           | 39        | 19       |
| <i>Scandix</i> sp.              | 9.9             | 89.7           | 72        | 31       |
| <i>Sedum confertiflorum</i>     | 13.8            | 82.6           | 48        | 24       |
| <i>Serapias cordigera</i>       | 9               | 92.6           | 83        | 31       |
| <i>Serapias vomeracea</i>       | 9.8             | 89.8           | 72        | 30       |
| <i>Taraxacum</i> sp.            | 12.4            | 83.5           | 54        | 27       |
| <i>Teucrium divaricatum</i>     | 11.8            | 90.8           | 99        | 20       |
| <i>Tolpis barbata</i>           | 7.1             | 95.7           | 136       | 35       |
| <i>Trifolium angustifolium</i>  | 11.8            | 88.9           | 50        | 29       |
| <i>Trifolium arvense</i>        | 8.2             | 94.2           | 109       | 33       |
| <i>Trifolium campestre</i>      | 10.8            | 85.1           | 67        | 28       |
| <i>Trifolium glanduliferum</i>  | 11.3            | 85.7           | 64        | 27       |
| <i>Tuberaria guttata</i>        | 9.9             | 89.7           | 72        | 31       |

**Supplementary Table 4.** Comparison of the node properties computed within the ‘static’ network of the entire flowering season and for the plant *phenonets* in the community. Properties were calculated using the function ‘specieslevel’ in the R package *bipartite* v.2.05, except for the functional role which was computed with the *NetCarto* software (see Methods). Plants with no insect visitors (*viz.* *Centaureum pulchellum*, *Geranium robertianum*, and *Papaver argemone*) as well as *Heliotropium lasiocarpum* that flowered alone, are not included. For details on each property see Materials and Methods.

| Plant                          | Normalized Degree |                 | Betweenness Centrality |                 | Closeness Centrality |                 | Functional Role |                 |
|--------------------------------|-------------------|-----------------|------------------------|-----------------|----------------------|-----------------|-----------------|-----------------|
|                                | static            | <i>phenonet</i> | static                 | <i>phenonet</i> | static               | <i>phenonet</i> | static          | <i>phenonet</i> |
| <i>Anagallis arvensis</i>      | 0.006             | 0.006           | 0.000                  | 0.000           | 0.020                | 0.021           | Peripheral      | Peripheral      |
| <i>Anemone cf. pavonina</i>    | 0.024             | 0.085           | 0.007                  | 0.020           | 0.028                | 0.043           | Peripheral      | Connector       |
| <i>Anthemis auriculata</i>     | 0.071             | 0.073           | 0.062                  | 0.052           | 0.031                | 0.032           | Connector       | Connector       |
| <i>Anthyllis hermanniae</i>    | 0.071             | 0.137           | 0.025                  | 0.040           | 0.029                | 0.050           | Module hub      | Peripheral      |
| <i>Asphodelus ramosus</i>      | 0.065             | 0.213           | 0.008                  | 0.034           | 0.027                | 0.045           | Peripheral      | Peripheral      |
| <i>Blackstonia perfoliata</i>  | 0.006             | 0.015           | 0.000                  | 0.000           | 0.021                | 0.023           | Peripheral      | Peripheral      |
| <i>Centaurea solstitialis</i>  | 0.018             | 0.048           | 0.004                  | 0.015           | 0.023                | 0.052           | Peripheral      | Peripheral      |
| <i>Cistus creticus</i>         | 0.411             | 0.430           | 0.207                  | 0.194           | 0.035                | 0.035           | Network hub     | Network hub     |
| <i>Cistus salvifolius</i>      | 0.113             | 0.182           | 0.020                  | 0.025           | 0.031                | 0.035           | Peripheral      | Connector       |
| <i>Crepis neglecta</i>         | 0.155             | 0.200           | 0.124                  | 0.138           | 0.030                | 0.032           | Module hub      | Module hub      |
| <i>Cuscuta epithymum</i>       | 0.143             | 0.260           | 0.021                  | 0.114           | 0.030                | 0.068           | Module hub      | Connector       |
| <i>Echium plantagineum</i>     | 0.054             | 0.063           | 0.025                  | 0.027           | 0.030                | 0.030           | Peripheral      | Peripheral      |
| <i>Fumana arabica</i>          | 0.077             | 0.082           | 0.059                  | 0.066           | 0.032                | 0.033           | Connector       | Connector       |
| <i>Genista acanthoclada</i>    | 0.012             | 0.043           | 0.000                  | 0.000           | 0.020                | 0.029           | Peripheral      | Peripheral      |
| <i>Hedypnois cretica</i>       | 0.054             | 0.094           | 0.013                  | 0.017           | 0.031                | 0.035           | Peripheral      | Peripheral      |
| <i>Lagoecia cuminoides</i>     | 0.012             | 0.029           | 0.001                  | 0.002           | 0.027                | 0.036           | Peripheral      | Peripheral      |
| <i>Lavandula stoechas</i>      | 0.125             | 0.137           | 0.102                  | 0.107           | 0.032                | 0.032           | Connector       | Peripheral      |
| <i>Linum trigynum</i>          | 0.048             | 0.056           | 0.032                  | 0.025           | 0.030                | 0.030           | Peripheral      | Module hub      |
| <i>Medicago minima</i>         | 0.018             | 0.065           | 0.014                  | 0.047           | 0.029                | 0.058           | Peripheral      | Peripheral      |
| <i>Moenchia mantica</i>        | 0.065             | 0.074           | 0.009                  | 0.010           | 0.029                | 0.029           | Connector       | Connector       |
| <i>Onopordum taunicum</i>      | 0.208             | 0.375           | 0.033                  | 0.049           | 0.029                | 0.059           | Module hub      | Module hub      |
| <i>Orchis sancta</i>           | 0.012             | 0.028           | 0.008                  | 0.021           | 0.026                | 0.032           | Peripheral      | Peripheral      |
| <i>Ornithogalum sp.</i>        | 0.030             | 0.100           | 0.004                  | 0.009           | 0.028                | 0.043           | Peripheral      | Peripheral      |
| <i>Prasium majus</i>           | 0.024             | 0.073           | 0.000                  | 0.000           | 0.020                | 0.029           | Peripheral      | Peripheral      |
| <i>Ranunculus paludosus</i>    | 0.024             | 0.103           | 0.004                  | 0.011           | 0.028                | 0.055           | Peripheral      | Peripheral      |
| <i>Scandix sp.</i>             | 0.065             | 0.153           | 0.001                  | 0.002           | 0.023                | 0.029           | Module hub      | Module hub      |
| <i>Sedum confertiflorum</i>    | 0.012             | 0.042           | 0.000                  | 0.000           | 0.000                | 0.000           | Peripheral      | Peripheral      |
| <i>Serapias cordigera</i>      | 0.018             | 0.036           | 0.001                  | 0.001           | 0.021                | 0.025           | Peripheral      | Peripheral      |
| <i>Serapias vomeracea</i>      | 0.006             | 0.014           | 0.000                  | 0.000           | 0.016                | 0.021           | Peripheral      | Peripheral      |
| <i>Taraxacum sp.</i>           | 0.089             | 0.278           | 0.046                  | 0.117           | 0.031                | 0.044           | Peripheral      | Connector       |
| <i>Teucrium divaricatum</i>    | 0.119             | 0.172           | 0.050                  | 0.106           | 0.030                | 0.050           | Peripheral      | Module hub      |
| <i>Tolpis barbata</i>          | 0.077             | 0.081           | 0.047                  | 0.029           | 0.032                | 0.033           | Peripheral      | Peripheral      |
| <i>Trifolium angustifolium</i> | 0.006             | 0.020           | 0.000                  | 0.000           | 0.019                | 0.025           | Peripheral      | Peripheral      |
| <i>Trifolium arvense</i>       | 0.060             | 0.092           | 0.050                  | 0.055           | 0.032                | 0.036           | Connector       | Peripheral      |
| <i>Trifolium campestre</i>     | 0.006             | 0.015           | 0.000                  | 0.000           | 0.025                | 0.034           | Peripheral      | Peripheral      |
| <i>Trifolium glanduliferum</i> | 0.054             | 0.094           | 0.021                  | 0.025           | 0.031                | 0.042           | Peripheral      | Peripheral      |
| <i>Tuberaria guttata</i>       | 0.018             | 0.042           | 0.002                  | 0.002           | 0.027                | 0.034           | Peripheral      | Peripheral      |

**Supplementary Table 5.** Vertical, horizontal, and chemical floral apparency in the study community.

| <b>Plant</b>                  | <b>Vertical<br/>apparency</b> | <b>Horizontal<br/>apparency</b> | <b>Total emissions<br/>apparency</b> | <b>Aliphatics<br/>apparency</b> | <b>Benzenoids<br/>apparency</b> | <b>Monoterpenes<br/>apparency</b> | <b>Sesquiterpenes<br/>apparency</b> |
|-------------------------------|-------------------------------|---------------------------------|--------------------------------------|---------------------------------|---------------------------------|-----------------------------------|-------------------------------------|
| <i>Anagallis arvensis</i>     | -12.89                        | 0.50                            | -0.15                                | 0.18                            | 0.09                            | -0.09                             | 0.00                                |
| <i>Anemone pavonina</i>       | 4.91                          | 1.44                            | -0.45                                | -0.10                           | 0.00                            | -0.04                             | 0.00                                |
| <i>Anthemis auriculata</i>    | -2.80                         | 2.26                            | 0.50                                 | 0.13                            | 0.01                            | 0.36                              | 0.30                                |
| <i>Anthyllis hermanniae</i>   | 11.56                         | -0.37                           | 80.94                                | 1.69                            | 12.61                           | 63.25                             | 1.78                                |
| <i>Asphodelus ramosus</i>     | 58.94                         | 0.75                            | -0.73                                | -0.29                           | -0.01                           | -0.10                             | 0.00                                |
| <i>Blackstonia perfoliata</i> | -8.59                         | -0.96                           | -0.52                                | -0.07                           | -0.01                           | -0.09                             | 0.00                                |
| <i>Centaurea solstitialis</i> | 6.98                          | -1.62                           | -1.12                                | -0.24                           | -0.01                           | -0.24                             | -0.05                               |
| <i>Centaureum pulchellum</i>  | -9.77                         | -1.82                           | -1.43                                | -0.29                           | -0.02                           | -0.34                             | -0.09                               |
| <i>Cistus creticus</i>        | 16.86                         | 139.73                          | 19.56                                | 0.31                            | 1.97                            | 4.63                              | 8.63                                |
| <i>Cistus salvifolius</i>     | 14.28                         | 64.10                           | 2.55                                 | 0.81                            | 0.26                            | 0.15                              | 0.98                                |
| <i>Crepis neglecta</i>        | 11.40                         | 8.41                            | 0.90                                 | 0.77                            | 0.00                            | 0.14                              | 0.00                                |
| <i>Cuscuta epithymum</i>      | 8.35                          | -0.96                           | -0.86                                | -0.12                           | 0.05                            | -0.23                             | -0.05                               |
| <i>Echium plantagineum</i>    | -9.38                         | -0.54                           | -0.57                                | -0.14                           | 0.00                            | -0.08                             | 0.00                                |
| <i>Fumana arabica</i>         | 4.15                          | 2.83                            | -0.11                                | 0.16                            | 0.04                            | -0.02                             | 0.00                                |
| <i>Genista acanthoclada</i>   | 24.86                         | -1.12                           | 0.24                                 | -0.13                           | 0.45                            | 0.15                              | 0.06                                |
| <i>Geranium robertianum</i>   | -12.21                        | -1.25                           | 0.61                                 | -0.23                           | 0.01                            | 0.80                              | 0.38                                |
| <i>Hedypnois cretica</i>      | -5.79                         | -0.14                           | 0.73                                 | 0.53                            | 0.07                            | 0.21                              | -0.01                               |
| <i>Lagoecia cuminoides</i>    | 0.19                          | -0.26                           | 26.36                                | -0.23                           | 3.08                            | 23.07                             | 0.83                                |
| <i>Lavandula stoechas</i>     | 17.68                         | 137.13                          | 391.45                               | 4.96                            | 0.00                            | 350.03                            | 30.70                               |
| <i>Linum trigynum</i>         | -5.69                         | 0.98                            | -0.26                                | -0.16                           | 0.00                            | 0.26                              | 0.00                                |
| <i>Medicago minima</i>        | -10.32                        | -1.54                           | -1.33                                | -0.39                           | -0.01                           | -0.31                             | -0.08                               |
| <i>Moenchia mantica</i>       | -3.38                         | 2.22                            | 1.21                                 | 1.50                            | 0.00                            | -0.05                             | 0.00                                |
| <i>Onopordum tauricum</i>     | 92.94                         | 14.19                           | -1.15                                | -0.24                           | -0.01                           | -0.27                             | -0.05                               |
| <i>Orchis sancta</i>          | 2.72                          | -1.18                           | 2.74                                 | -0.20                           | 3.25                            | -0.12                             | 0.09                                |
| <i>Ornithogalum sp.</i>       | -9.06                         | -1.16                           | -0.64                                | -0.28                           | -0.01                           | -0.07                             | -0.01                               |
| <i>Papaver argemone</i>       | 0.48                          | -0.72                           | -0.94                                | -0.27                           | -0.01                           | -0.18                             | -0.02                               |
| <i>Prasium majus</i>          | 46.57                         | -1.26                           | -0.72                                | -0.26                           | -0.01                           | -0.07                             | 0.02                                |

| <b>Plant</b>                   | <b>Vertical<br/>apparency</b> | <b>Horizontal<br/>apparency</b> | <b>Total emissions<br/>apparency</b> | <b>Aliphatics<br/>apparency</b> | <b>Benzenoids<br/>apparency</b> | <b>Monoterpenes<br/>apparency</b> | <b>Sesquiterpenes<br/>apparency</b> |
|--------------------------------|-------------------------------|---------------------------------|--------------------------------------|---------------------------------|---------------------------------|-----------------------------------|-------------------------------------|
| <i>Ranunculus paludosus</i>    | -4.00                         | -1.51                           | -0.25                                | -0.28                           | -0.02                           | 0.43                              | -0.01                               |
| <i>Scandix</i> sp.             | 2.41                          | 2.01                            | 219.88                               | 2.47                            | 214.56                          | 2.09                              | 1.13                                |
| <i>Sedum confertiflorum</i>    | -10.98                        | -1.62                           | -0.67                                | -0.28                           | 0.00                            | -0.07                             | 0.01                                |
| <i>Serapias cordigera</i>      | 3.36                          | 3.68                            | 0.14                                 | 0.64                            | -0.01                           | -0.11                             | 0.00                                |
| <i>Serapias vomeracea</i>      | 3.69                          | -0.15                           | 0.19                                 | 0.65                            | -0.01                           | -0.10                             | 0.00                                |
| <i>Taraxacum</i> sp.           | 8.90                          | 0.78                            | -0.69                                | -0.24                           | -0.01                           | -0.11                             | -0.01                               |
| <i>Teucrium divaricatum</i>    | 25.87                         | 4.34                            | 24.66                                | 4.00                            | -0.01                           | 6.28                              | 14.79                               |
| <i>Tolpis barbata</i>          | -1.87                         | 4.76                            | 0.06                                 | 0.26                            | 0.00                            | -0.05                             | 0.05                                |
| <i>Trifolium angustifolium</i> | -9.29                         | -1.27                           | -0.36                                | 0.06                            | 0.00                            | -0.09                             | -0.01                               |
| <i>Trifolium arvense</i>       | -8.73                         | 6.66                            | -0.27                                | -0.21                           | 0.03                            | 0.10                              | -0.01                               |
| <i>Trifolium campestre</i>     | -7.53                         | 1.47                            | 2.83                                 | 2.46                            | 0.34                            | 0.30                              | 0.02                                |
| <i>Trifolium glanduliferum</i> | -9.23                         | 6.60                            | 80.12                                | 6.60                            | 64.84                           | 5.80                              | 2.02                                |
| <i>Tuberaria guttata</i>       | -0.54                         | 0.35                            | -0.28                                | -0.14                           | -0.01                           | 0.22                              | -0.01                               |

**Supplementary Table 6.** Flowering phenology, floral morphology and the volatility of the scent blends of the plants in the community. Days of flowering and floral density represent mean values of the two years of sampling, except for *Geranium robertianum* and *Heliotropium europaeum* that were observed in the community only in the second year. Note that *Cuscuta epithimum* is a parasitic vine that was found on *Cistus creticus* towards the end of its flowering period.

| Abbrev. | Plant                           | First day of flowering <sup>1</sup> | Last day of flowering <sup>1</sup> | Floral density (fl. units/m <sup>2</sup> ) | Corolla depth <sup>2</sup> | Symmetry      | Floral surface (cm <sup>2</sup> ) | Floral height (cm) | Mean nBP (°C) |
|---------|---------------------------------|-------------------------------------|------------------------------------|--------------------------------------------|----------------------------|---------------|-----------------------------------|--------------------|---------------|
| ANA     | <i>Anagallis arvensis</i>       | 102                                 | 169                                | 3.23                                       | short                      | actinomorphic | 0.47                              | 3.71               | 218.1         |
| ANE     | <i>Anemone pavonina</i>         | 102                                 | 117                                | 0.23                                       | short                      | actinomorphic | 13.67                             | 20.67              | 222.9         |
| ANL     | <i>Anthemis auriculata</i>      | 117                                 | 169                                | 0.67                                       | short                      | actinomorphic | 4.95                              | 13.97              | 207.7         |
| ANT     | <i>Anthyllis hermanniae</i>     | 141                                 | 152                                | 8.58                                       | short                      | zygomorphic   | 0.12                              | 28.79              | 227.5         |
| ASP     | <i>Asphodelus ramosus</i>       | 102                                 | 117                                | 0.71                                       | short                      | actinomorphic | 3.39                              | 74.65              | 206.7         |
| BLA     | <i>Blackstonia perfoliata</i>   | 117                                 | 138                                | 1.09                                       | short                      | actinomorphic | 0.29                              | 6.74               | 188.8         |
| CEP     | <i>Centaurea solstitialis</i>   | 152                                 | 155                                | 0.01                                       | long                       | actinomorphic | 0.58                              | 25.95              | 213.1         |
| CES     | <i>Centaurium pulchellum</i>    | 147                                 | 152                                | 0.01                                       | short                      | actinomorphic | 0.49                              | 10.11              | 228.5         |
| CIC     | <i>Cistus creticus</i>          | 102                                 | 173                                | 8.29                                       | short                      | actinomorphic | 16.97                             | 33.48              | 235.2         |
| CIS     | <i>Cistus salvifolius</i>       | 102                                 | 146                                | 6.70                                       | short                      | actinomorphic | 9.74                              | 30.28              | 209.6         |
| CRE     | <i>Crepis neglecta</i>          | 117                                 | 161                                | 3.69                                       | long                       | actinomorphic | 2.56                              | 28.20              | 205.6         |
| CUS     | <i>Cuscuta epithimum</i>        | 152                                 | 173                                | 1.50                                       | short                      | actinomorphic | 0.47                              | 27.35              | 221.4         |
| ECH     | <i>Echium plantagineum</i>      | 110                                 | 169                                | 0.32                                       | long                       | zygomorphic   | 1.39                              | 7.25               | 169.9         |
| FUM     | <i>Fumana arabica</i>           | 102                                 | 173                                | 0.96                                       | short                      | actinomorphic | 3.97                              | 20.75              | 206.3         |
| GEN     | <i>Genista acanthoclada</i>     | 102                                 | 117                                | 0.73                                       | long                       | zygomorphic   | 0.73                              | 40.53              | 208.2         |
| GER     | <i>Geranium robertianum</i>     | 125                                 | 153                                | 0.08                                       | short                      | actinomorphic | 0.56                              | 4.63               | 226.8         |
| HED     | <i>Hedypnois cretica</i>        | 102                                 | 143                                | 1.99                                       | long                       | actinomorphic | 0.44                              | 9.82               | 202.2         |
| HEL     | <i>Heliotropium lasiocarpum</i> | 178                                 | 178                                | 0.10                                       | short                      | actinomorphic | 4.42                              | 16.71              | 200.9         |
| LAG     | <i>Lagoecia cuminoides</i>      | 130                                 | 152                                | 1.30                                       | short                      | actinomorphic | 0.66                              | 17.21              | 180.5         |
| LAV     | <i>Lavandula stoechas</i>       | 102                                 | 163                                | 28.99                                      | long                       | zygomorphic   | 4.76                              | 34.23              | 209.1         |
| LIN     | <i>Linum trigynum</i>           | 110                                 | 169                                | 18.05                                      | short                      | actinomorphic | 0.11                              | 10.87              | 166.0         |
| MED     | <i>Medicago minima</i>          | 136                                 | 146                                | 0.56                                       | short                      | zygomorphic   | 0.07                              | 5.10               | 201.2         |
| MOE     | <i>Moenchia mantica</i>         | 102                                 | 157                                | 3.34                                       | long                       | actinomorphic | 0.96                              | 13.33              | 222.1         |
| ONO     | <i>Onopordum tauricum</i>       | 147                                 | 176                                | 0.40                                       | long                       | actinomorphic | 39.43                             | 111.47             | 202.5         |

| Abbrev. | Plant                          | First day of flowering <sup>1</sup> | Last day of flowering <sup>1</sup> | Floral density (fl. units/m <sup>2</sup> ) | Corolla depth <sup>2</sup> | Symmetry      | Floral surface (cm <sup>2</sup> ) | Floral height (cm) | Mean nBP (°C) |
|---------|--------------------------------|-------------------------------------|------------------------------------|--------------------------------------------|----------------------------|---------------|-----------------------------------|--------------------|---------------|
| ORC     | <i>Orchis sancta</i>           | 102                                 | 130                                | 0.07                                       | long                       | zygomorphic   | 1.01                              | 18.33              | 261.8         |
| ORN     | <i>Ornithogalum</i> sp.        | 117                                 | 122                                | 0.12                                       | short                      | actinomorphic | 3.44                              | 7.00               | 194.8         |
| PAP     | <i>Papaver argemone</i>        | 128                                 | 141                                | 0.02                                       | short                      | actinomorphic | 19.81                             | 16.31              | 244.6         |
| PRA     | <i>Prasium majus</i>           | 122                                 | 133                                | 0.04                                       | long                       | zygomorphic   | 1.35                              | 61.75              | 205.6         |
| RAN     | <i>Ranunculus paludosus</i>    | 102                                 | 110                                | 0.16                                       | short                      | actinomorphic | 2.35                              | 13.70              | 198.2         |
| SCA     | <i>Scandix</i> sp.             | 102                                 | 132                                | 3.01                                       | short                      | actinomorphic | 1.08                              | 18.00              | 237.8         |
| SED     | <i>Sedum confertiflorum</i>    | 102                                 | 117                                | 0.54                                       | short                      | actinomorphic | 0.12                              | 4.66               | 211.1         |
| SEC     | <i>Serapias cordigera</i>      | 102                                 | 138                                | 1.86                                       | long                       | zygomorphic   | 2.60                              | 18.68              | 268.3         |
| SEV     | <i>Serapias vomeracea</i>      | 102                                 | 130                                | 1.43                                       | long                       | zygomorphic   | 0.72                              | 19.56              | 274.5         |
| TAR     | <i>Taraxacum</i> sp.           | 102                                 | 125                                | 0.20                                       | long                       | actinomorphic | 10.77                             | 24.25              | 247.0         |
| TEU     | <i>Teucrium divaricatum</i>    | 139                                 | 176                                | 7.80                                       | long                       | zygomorphic   | 0.74                              | 43.50              | 215.1         |
| TOL     | <i>Tolpis barbata</i>          | 117                                 | 173                                | 2.93                                       | short                      | actinomorphic | 1.98                              | 14.96              | 212.1         |
| TRA     | <i>Trifolium angustifolium</i> | 117                                 | 130                                | 1.94                                       | short                      | zygomorphic   | 0.03                              | 6.55               | 202.9         |
| TRV     | <i>Trifolium arvense</i>       | 122                                 | 161                                | 7.66                                       | short                      | zygomorphic   | 1.00                              | 7.75               | 200.1         |
| TRC     | <i>Trifolium campestre</i>     | 102                                 | 128                                | 3.48                                       | short                      | zygomorphic   | 0.80                              | 7.95               | 206.8         |
| TRG     | <i>Trifolium glanduliferum</i> | 102                                 | 127                                | 6.54                                       | short                      | zygomorphic   | 1.22                              | 5.99               | 217.7         |
| TUB     | <i>Tuberaria guttata</i>       | 102                                 | 134                                | 1.02                                       | short                      | actinomorphic | 1.54                              | 15.12              | 202.3         |

<sup>1</sup>Day numbers of the Julian calendar.

<sup>2</sup>short < 3 mm; long ≥ 3 mm.

**Supplementary Table 7.** The phylogenetic signal in all floral traits and attributes used in the present study. Different methods have been used according to variable type (see Methods).  $D$ : statistic for binary traits;  $P_{\text{rand}}$ : probability of  $D$  resulting from no (random) phylogenetic structure;  $P_{\text{Brown}}$ : probability of  $D$  resulting from Brownian phylogenetic structure. DM: distance matrix (Bray-Curtis).  $P$ -values implying significance ( $P \leq 0.050$ ) are shown in bold.

| Trait/matrix                                    | Pagel's $\lambda$ | $P$          | $D$   | $P_{\text{random}}$ | $P_{\text{Brownian}}$ | Mantel $r$ | $P$   |
|-------------------------------------------------|-------------------|--------------|-------|---------------------|-----------------------|------------|-------|
| Trichromatic saturation: $r_{\text{tri}}$       | 0.22              | 0.199        |       |                     |                       |            |       |
| Trichromatic hue: $\theta_{\text{tri}}$         | 0.00              | 1.000        |       |                     |                       |            |       |
| Tetrachromatic saturation: $r_{\text{tet}}$     | <b>0.83</b>       | <b>0.003</b> |       |                     |                       |            |       |
| Tetrachromatic hue angle: $\phi_{\text{tet}}$   | 0.00              | 1.000        |       |                     |                       |            |       |
| Tetrachromatic hue angle: $\theta_{\text{tet}}$ | 0.00              | 1.000        |       |                     |                       |            |       |
| Proportion (%) of aliphatics                    | 0.00              | 1.000        |       |                     |                       |            |       |
| Proportion (%) of benzenoids                    | 0.00              | 1.000        |       |                     |                       |            |       |
| Proportion (%) of monoterpenes                  | 0.00              | 1.000        |       |                     |                       |            |       |
| Proportion (%) of sesquiterpenes                | 0.38              | 0.232        |       |                     |                       |            |       |
| Apparency of aliphatic emissions                | 0.00              | 1.000        |       |                     |                       |            |       |
| Apparency of benzenoid emissions                | 0.00              | 1.000        |       |                     |                       |            |       |
| Apparency of monoterpene emissions              | 0.00              | 1.000        |       |                     |                       |            |       |
| Apparency of sesquiterpene emissions            | 0.21              | 0.675        |       |                     |                       |            |       |
| Apparency of total emissions                    | 0.00              | 1.000        |       |                     |                       |            |       |
| Normal boiling point of the scent blend         | <b>0.87</b>       | <b>0.008</b> |       |                     |                       |            |       |
| Floral height apparency                         | 0.00              | 1.000        |       |                     |                       |            |       |
| Floral surface apparency                        | 0.00              | 1.000        |       |                     |                       |            |       |
| Start date                                      | 0.20              | 0.497        |       |                     |                       |            |       |
| Flowering duration                              | 0.00              | 1.000        |       |                     |                       |            |       |
| Normalized degree                               | 0.00              | 1.000        |       |                     |                       |            |       |
| Betweenness centrality                          | <b>0.47</b>       | <b>0.043</b> |       |                     |                       |            |       |
| Closeness centrality                            | 0.00              | 1.000        |       |                     |                       |            |       |
| Nectar                                          |                   |              | 0.09  | <b>0.006</b>        | <b>0.471</b>          |            |       |
| Symmetry                                        |                   |              | -0.75 | <b>0.000</b>        | <b>0.955</b>          |            |       |
| Corolla depth                                   |                   |              | -0.15 | <b>0.000</b>        | <b>0.958</b>          |            |       |
| Plant interactions DM (weighted)                |                   |              |       |                     |                       | 0.09       | 0.062 |
| Pollinator interactions DM (weighted)           |                   |              |       |                     |                       | -0.01      | 0.671 |



**Supplementary Table 8.** The independent variables (predictors) used in the present study in order to estimate the best models (PGLS or MGLM) according to AIC.

| <b>Variable</b>                                                                               | <b>Type</b>                   |
|-----------------------------------------------------------------------------------------------|-------------------------------|
| Trichromatic saturation: $r_{\text{tri}}$                                                     | Continuous                    |
| Trichromatic hue: $\theta_{\text{tri}}$                                                       | Continuous                    |
| Trichromatic color: $r_{\text{tri}} \times \theta_{\text{tri}}$                               | Interaction term – Continuous |
| Tetrachromatic saturation: $r_{\text{tet}}$                                                   | Continuous                    |
| Tetrachromatic hue: $\theta_{\text{tet}}$ and $\varphi_{\text{tet}}$                          | Continuous                    |
| Tetrachromatic color: $r_{\text{tet}} \times \theta_{\text{tet}} \times \varphi_{\text{tet}}$ | Interaction term – Continuous |
| Proportion (%) of aliphatics in the scent blend                                               | Proportion                    |
| Proportion (%) of benzenoids in the scent blend                                               | Proportion                    |
| Proportion (%) of monoterpenes in the scent blend                                             | Proportion                    |
| Proportion (%) of sesquiterpenes in the scent blend                                           | Proportion                    |
| Apparency of aliphatic emissions                                                              | Continuous                    |
| Apparency of benzenoid emissions                                                              | Continuous                    |
| Apparency of monoterpene emissions                                                            | Continuous                    |
| Apparency of sesquiterpene emissions                                                          | Continuous                    |
| Interaction of VOC class apparencies                                                          | Interaction term – Continuous |
| Apparency of total emissions                                                                  | Continuous                    |
| Normal boiling point of the scent blend                                                       | Continuous                    |
| Nectar presence/absence                                                                       | Binary                        |
| Symmetry (actinomorphic/zygomorphic)                                                          | Binary                        |
| Corolla depth (short/long)                                                                    | Binary                        |
| Floral height apparency                                                                       | Continuous                    |
| Floral surface apparency                                                                      | Continuous                    |
| Flowering phenology (start date $\times$ flowering duration)                                  | Interaction term – Integers   |
