# Supplementary material for: Disentangling the role of floral sensory stimuli in pollination networks
Source: PubMed Central journal article supplement (PMC5847531; doi:10.1038/s41467-018-03448-w), 2018-03-12
Supplement: 41467_2018_3448_MOESM3_ESM.pdf [file 41467_2018_3448_MOESM3_ESM.pdf]

### **Description of Supplementary Files**

File Name: Supplementary Data 1

Description: The plant-pollinator network of the study scrubland in Lesvos Island, Greece.

File Name: Supplementary Data 2

Description: Inflorescence volatile compounds of the plant species studied.
